# Supplementary material for: Mesenchymal stem cell (MSC) viability on PVA and PCL polymer coated hydroxyapatite scaffolds derived from cuttlefish
Source: Royal Society of Chemistry journal article supplement (doi:10.1039/c5ra22423c), 2016-01-01
Supplement: c5ra22423c1.pdf [file c5ra22423c1.pdf]

Supplementary information:

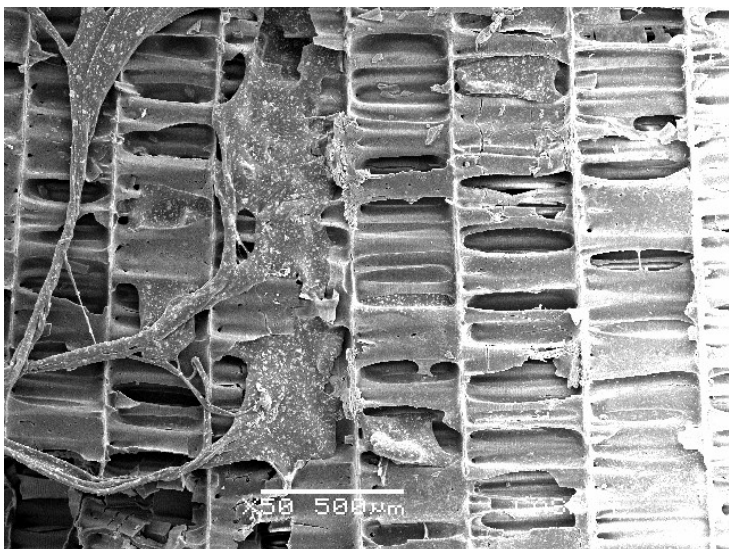

**S.Fig. 1** SBF studied PVA coated CB-HA

The above figure shows that SBF studied PVA coated CB-HA showed similar kind of behavior as shown by SBF studied PCL coated CB-HA that has been described in the paper.
